# Supplementary material for: Fungal Endophytes: Discovering What Lies within Some of Canada’s Oldest and Most Resilient Grapevines
Source: Preprints.org preprint supplement (doi:10.20944/preprints202312.0585.v1), 2023-12-08
Supplement: Supplementary file 1 [file supplementary]

Figure 2. *C. fioriniae*

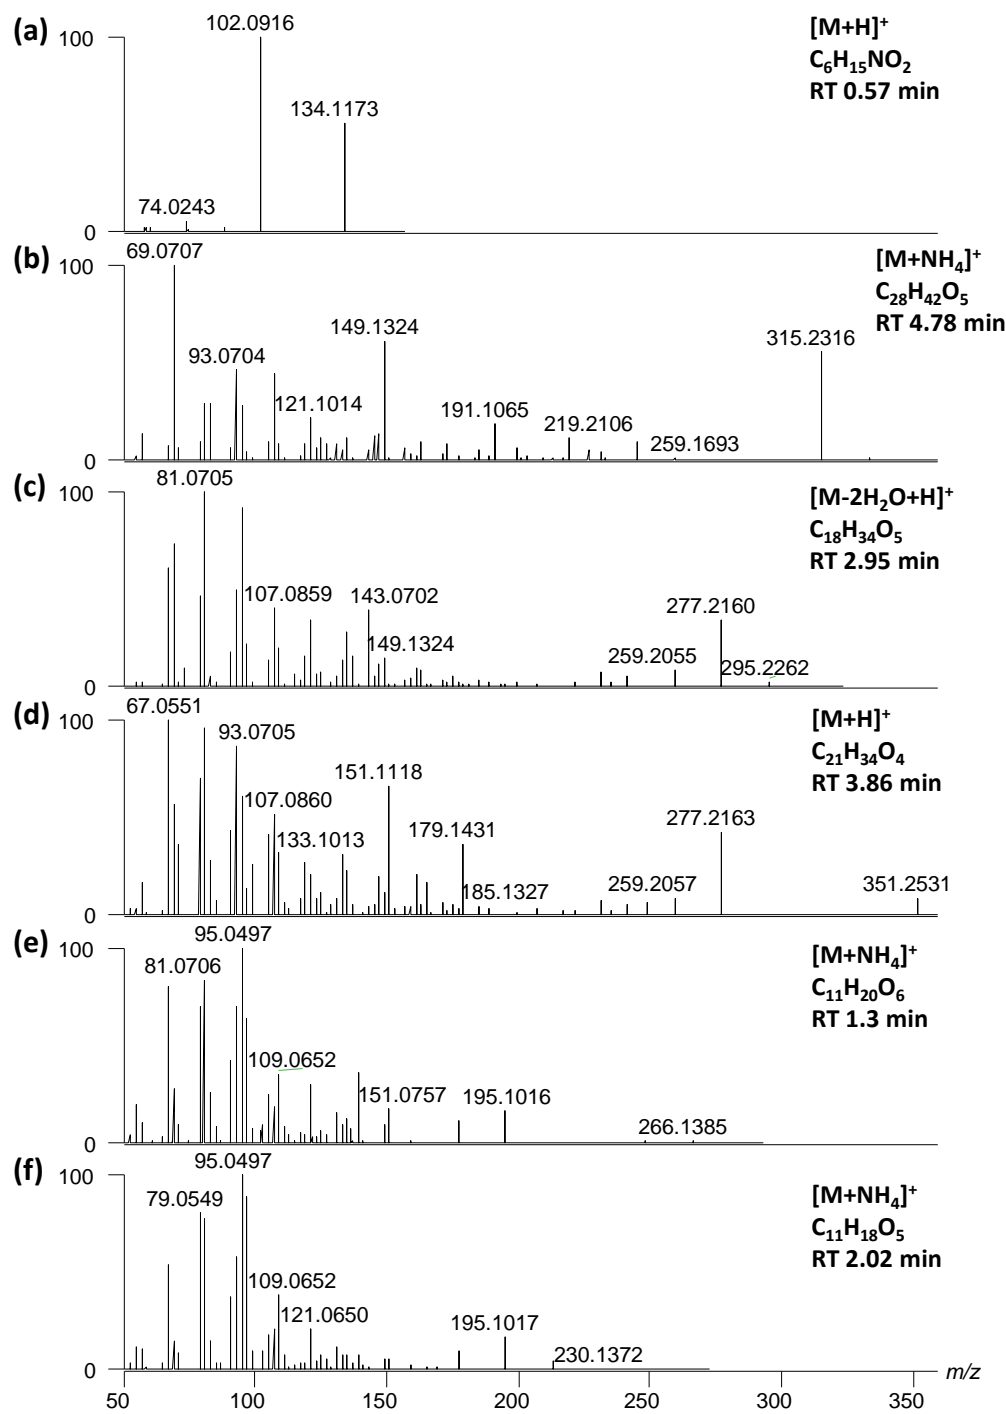

Figure 3 N.  
*niveniae*

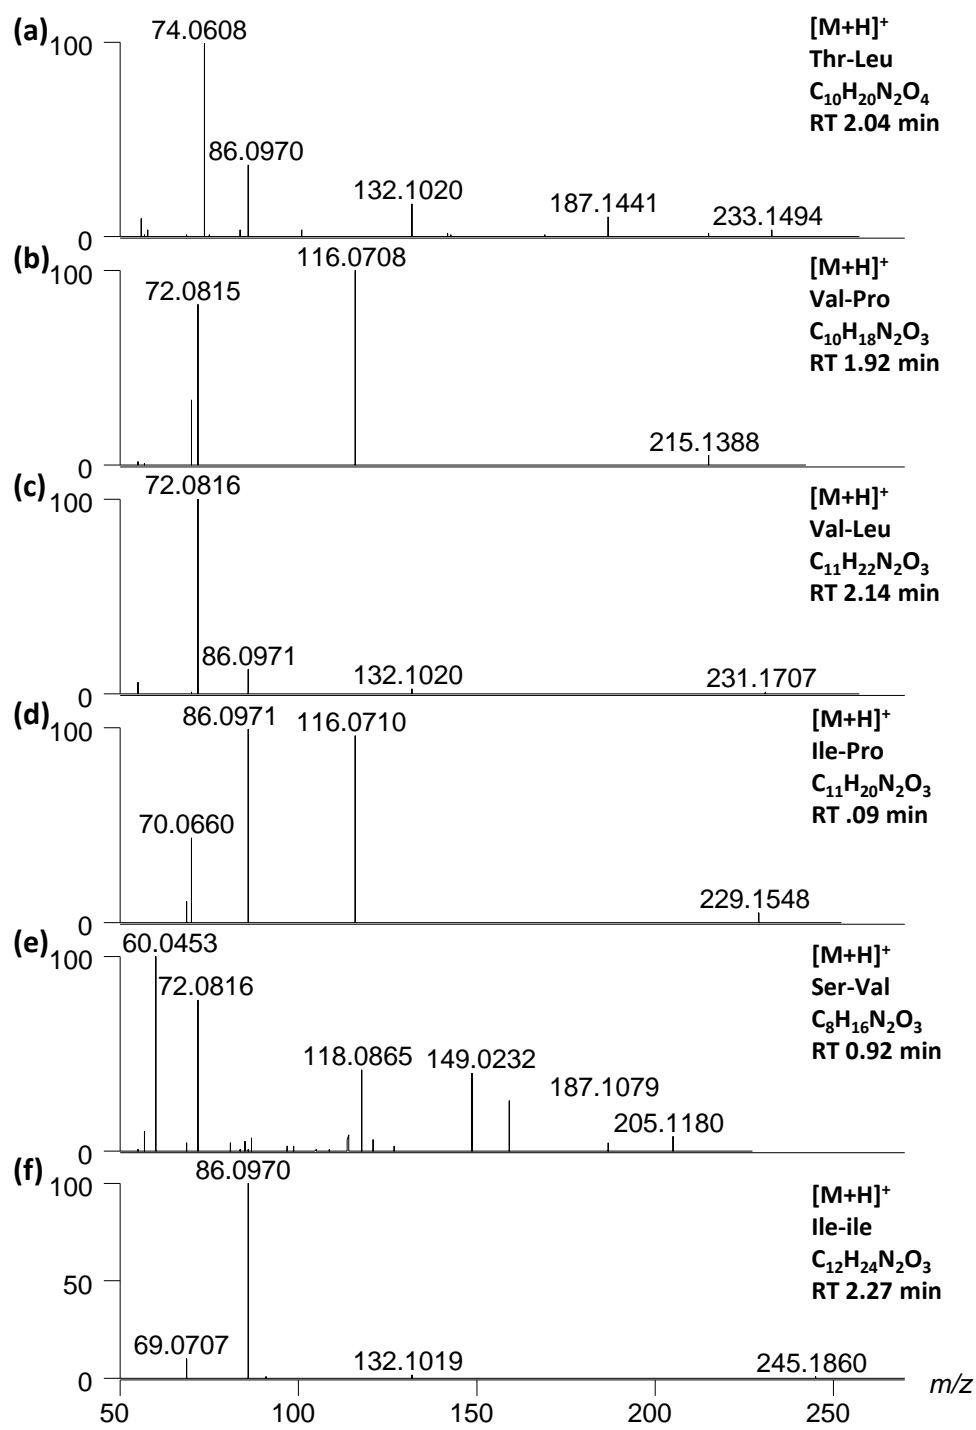

Figure x + 3

Figure 4 G .  
paraclavulata

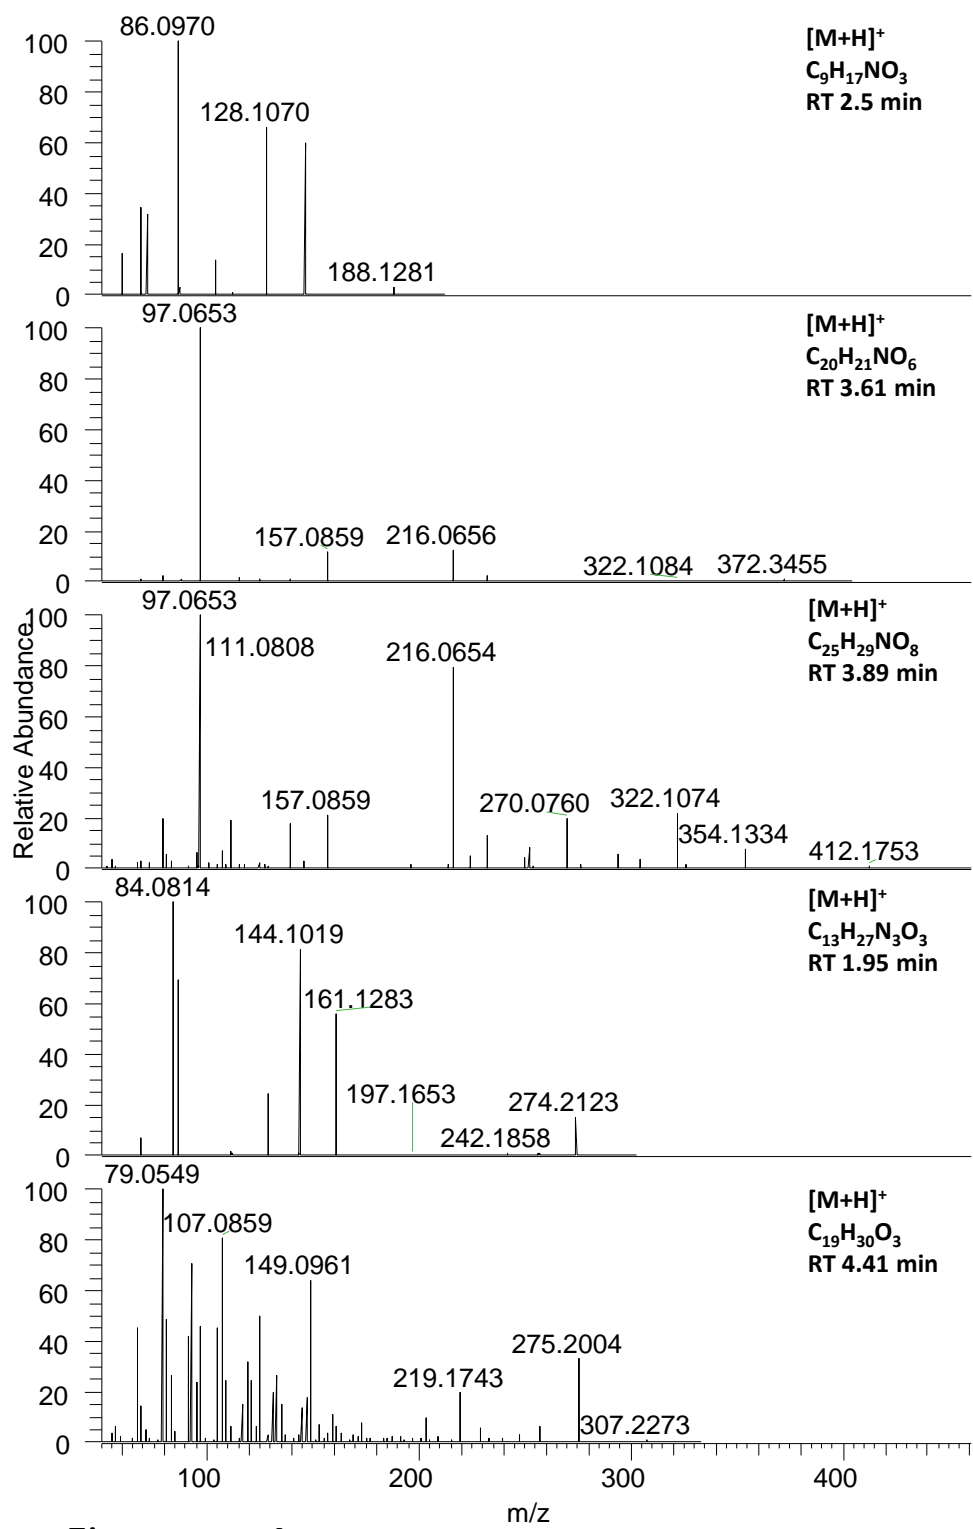

Figure x + 4

*D. aff. Gulyae*  
(En20-4)

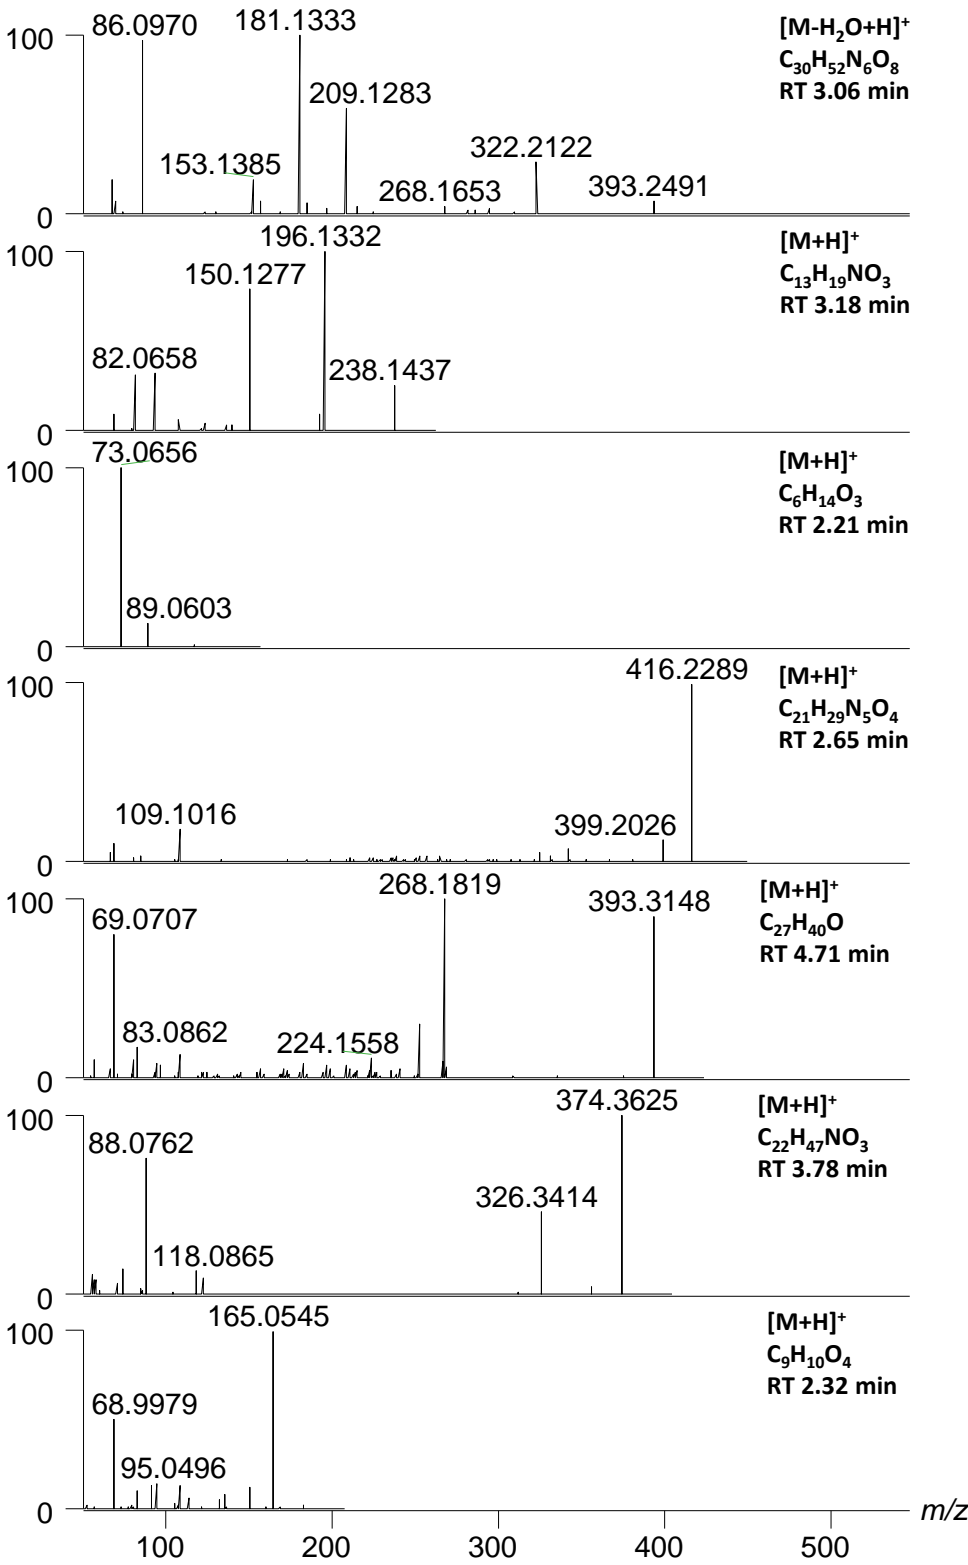

Figure x + 5

D. Ep (En01-1)

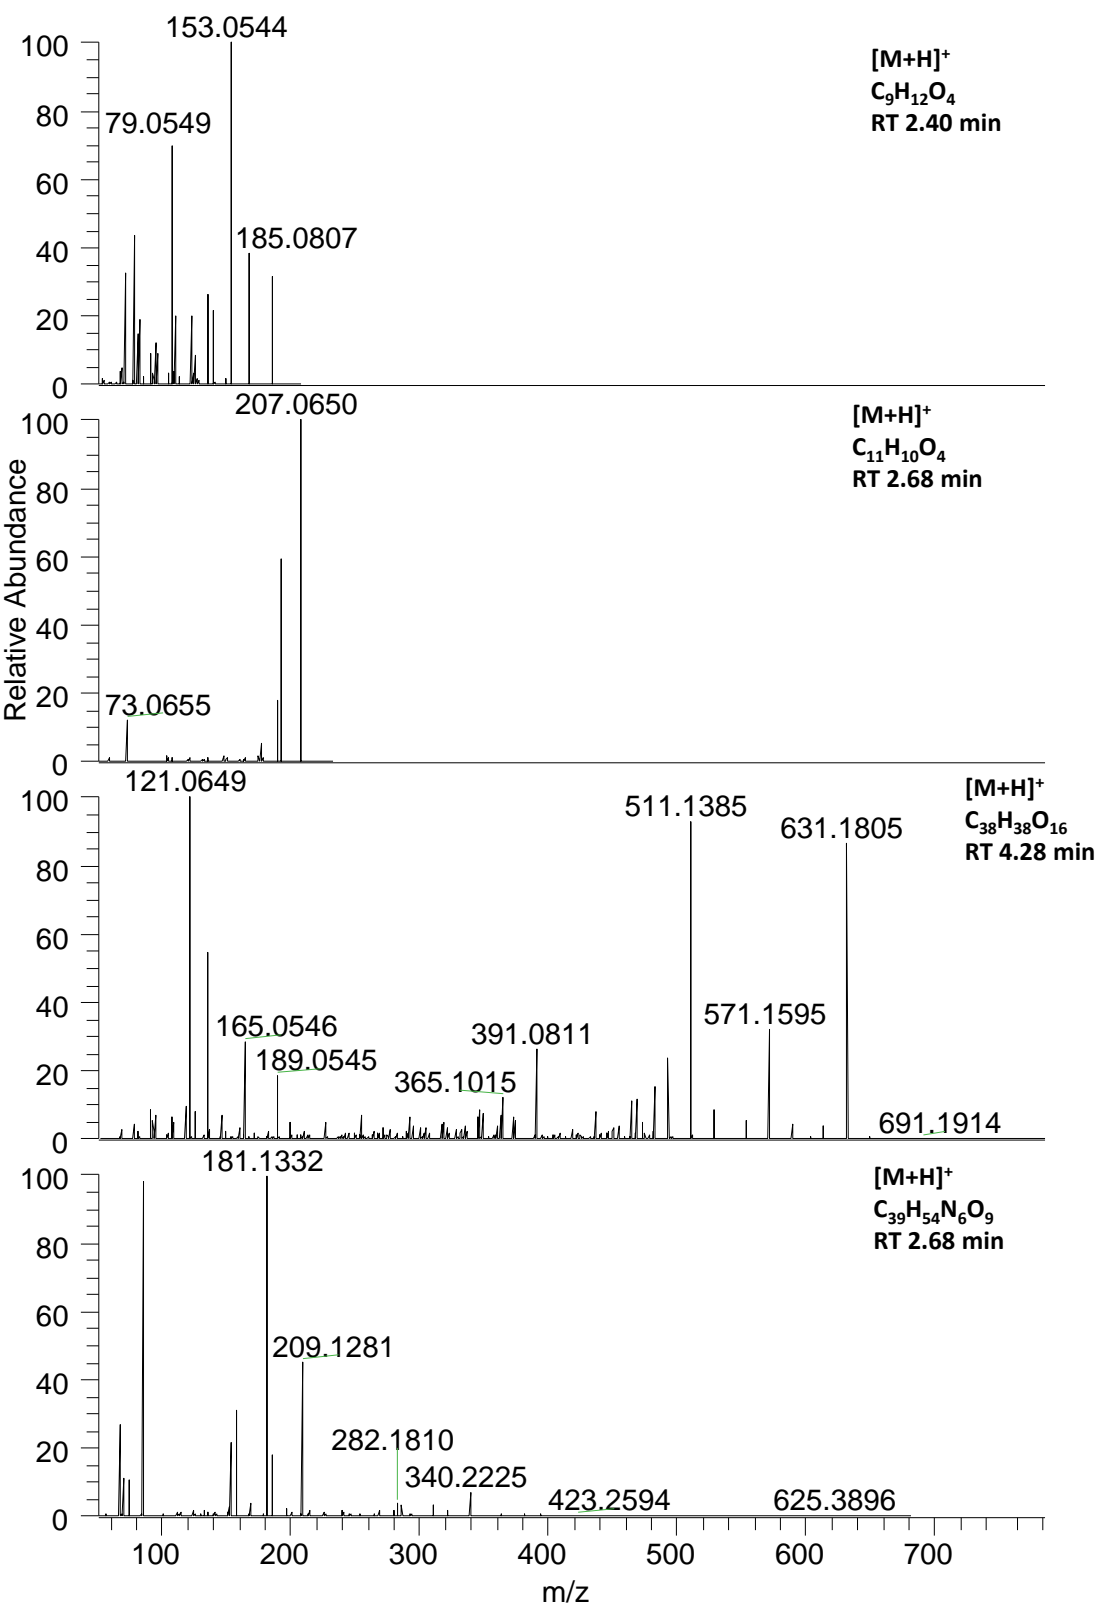

Figure x + 6
