# Supplementary material for: Fungal Endophytes: Discovering What Lies within Some of Canada’s Oldest and Most Resilient Grapevines
Source: Preprints.org preprint supplement (doi:10.20944/preprints202312.0585.v1), 2023-12-08
Supplement: Supplementary file 2 [file supplementary]

Unclassified /  
Non  
classified

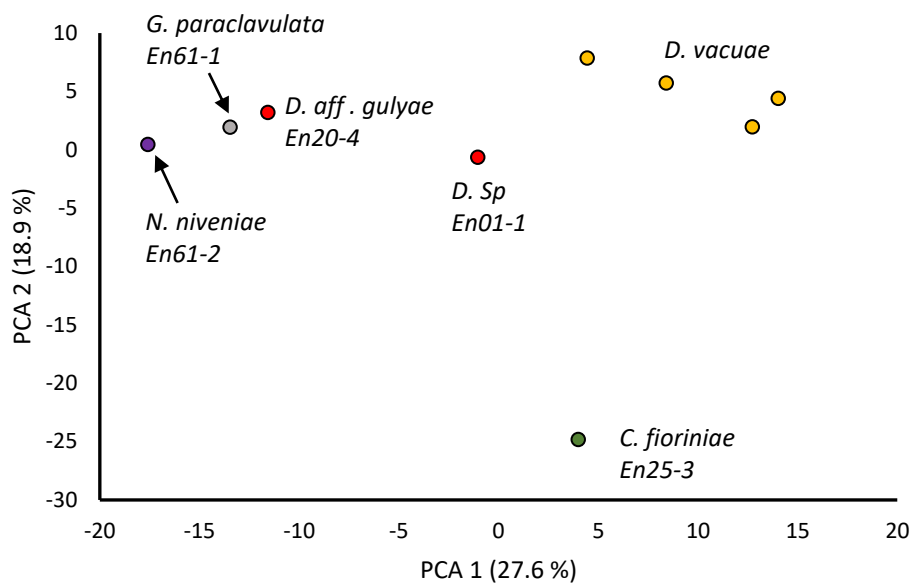

**Figure 13.** Principal component analysis derived from ESI+ features extracted with XCMS. Diaporthe species show some degree of clustering, while En25-3, *Colletotrichum fioriniae* is distinct from all other tested strains.
