# Supplementary figures and images for: Fungal Endophytes: Discovering What Lies within Some of Canada’s Oldest and Most Resilient Grapevines
Source: Preprints.org preprint supplement (doi:10.20944/preprints202312.0585.v1), 2023-12-08

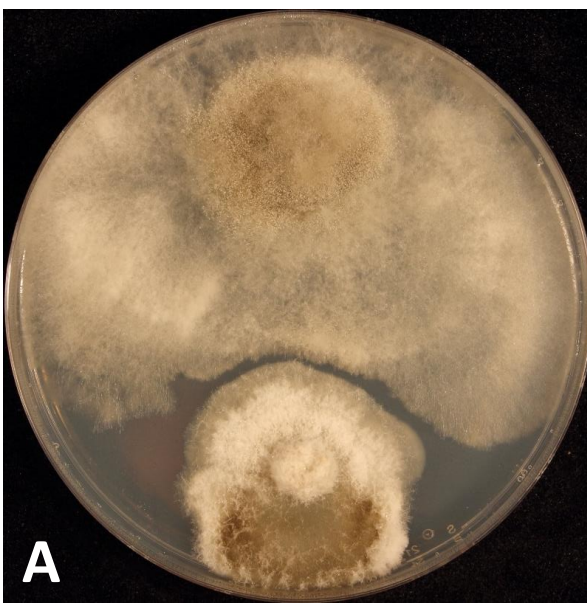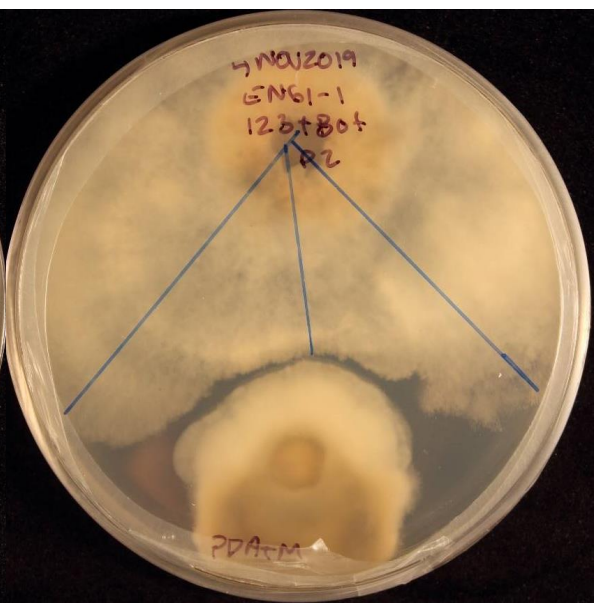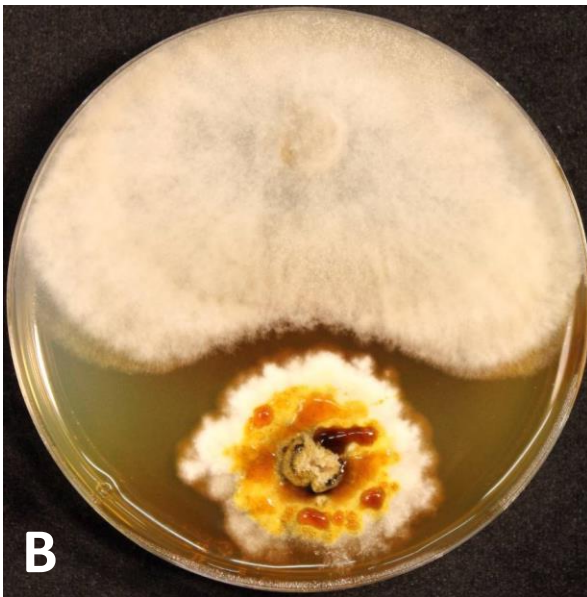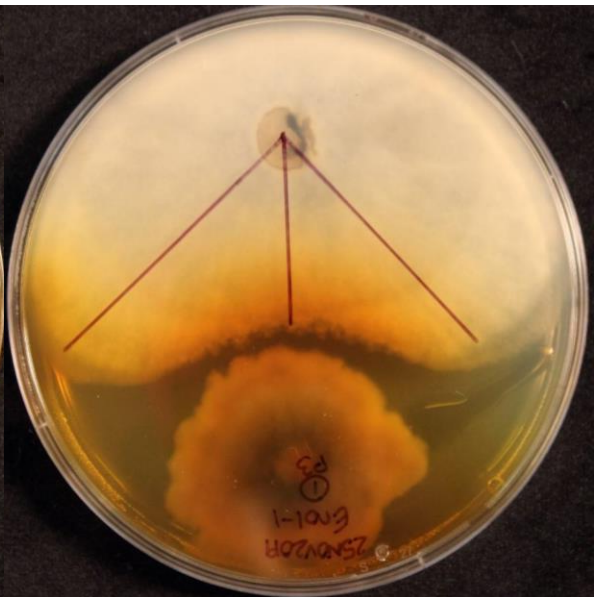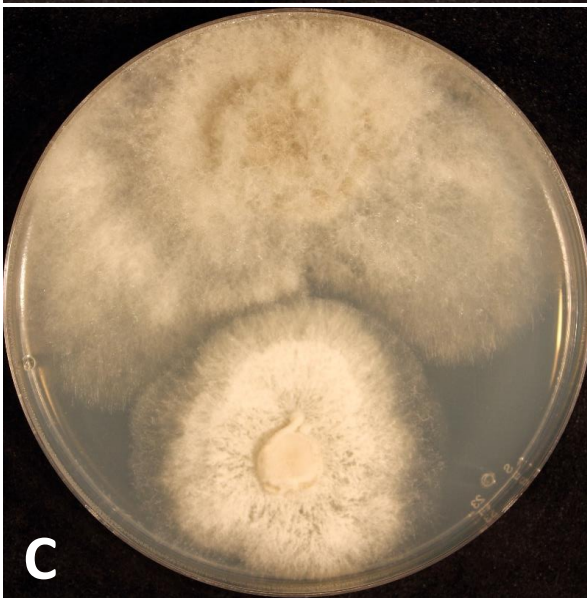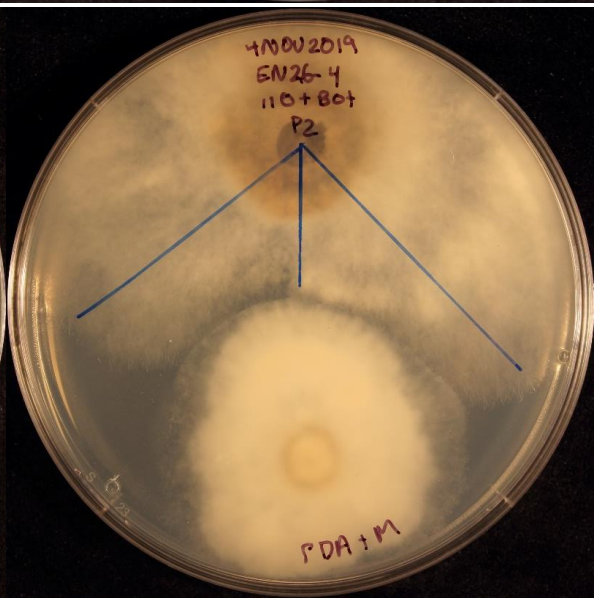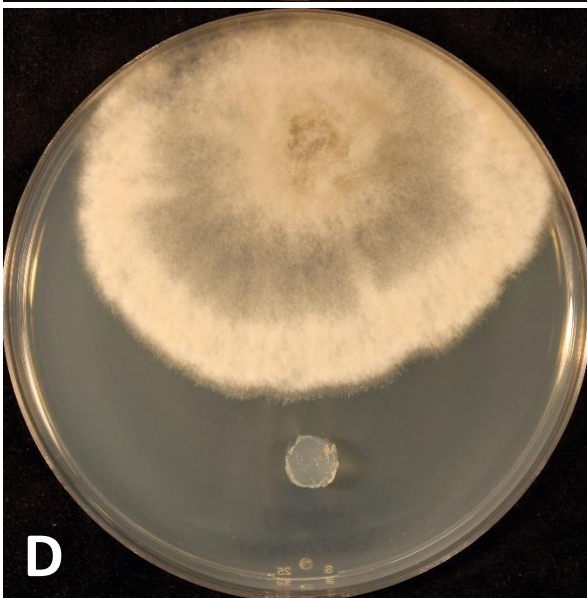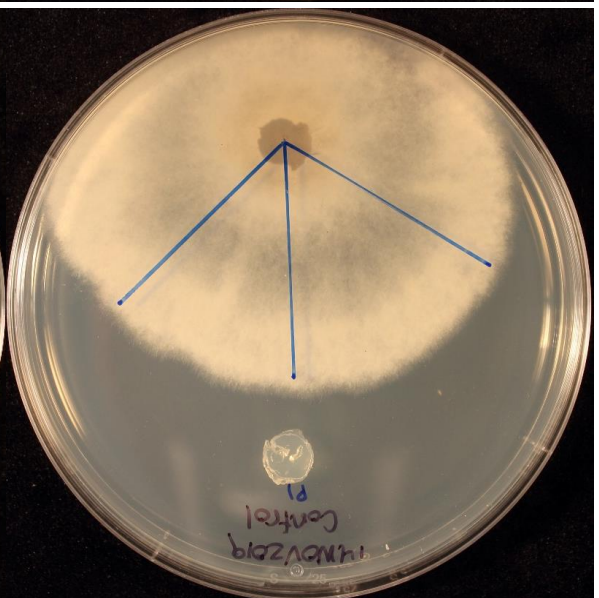

Supplement: Supplementary file 3 [file supplementary]
